# Supplementary material for: Boosting the thermoelectric performance of misfit-layered (SnS)1.2(TiS2)2 by a Co- and Cu-substituted alloying effect
Source: Royal Society of Chemistry journal article supplement (doi:10.1039/c8ta08426b), 2018-01-01
Supplement: c8ta08426b1.pdf [file c8ta08426b1.pdf]

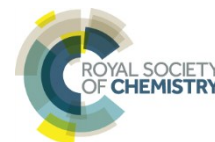

## Electronic Supplementary Information

### Boosting the thermoelectric performance of misfit-layered $(\text{SnS})_{1.2}(\text{TiS}_2)_2$ by a Co- and Cu-substituted alloying effect

Cong Yin,<sup>a</sup> Qing Hu,<sup>a</sup> Mingjing Tang,<sup>a</sup> Hangtian Liu,<sup>a</sup> Zhiyu Chen,<sup>a</sup> Zhengshang Wang<sup>a</sup> and Ran Ang<sup>\*ab</sup>

<sup>a</sup> Key Laboratory of Radiation Physics and Technology, Ministry of Education, Institute of Nuclear Science and Technology, Sichuan University, Chengdu 610064, China

<sup>b</sup> Institute of New Energy and Low-Carbon Technology, Sichuan University, Chengdu 610065, China

\*Corresponding author and E-mail: rang@scu.edu.cn

## Analysis and fitting of x-ray absorption fine structure (XAFS)

The synchrotron radiation *in situ* x-ray absorption fine structure (XAFS) spectroscopy for the (SnS)<sub>1.2</sub>(TiS<sub>2</sub>)<sub>2</sub>, (SnS)<sub>1.2</sub>(Co<sub>0.02</sub>Ti<sub>0.98</sub>S<sub>2</sub>)<sub>2</sub>, and (SnS)<sub>1.2</sub>(Cu<sub>0.02</sub>Ti<sub>0.98</sub>S<sub>2</sub>)<sub>2</sub> samples were performed at the 1W1B beamline, utilizing the Beijing Synchrotron Radiation Facility (BSRF) of China. The data of Ti *K*-edge XAFS spectroscopy for the three samples were collected in transmission mode using ion chambers filled with nitrogen. Taking into account the low content of Co and Cu ions in the substituted samples, the data of Co and Cu *K*-edge XAFS spectroscopy were recorded in fluorescence mode using a Lytle detector to monitor the fluorescence.<sup>1</sup>

In order to obtain high-quality data, the raw XAFS spectroscopy with some called “glitches” have to be removed firstly via deglitching technique before further processing, and subtracting the pre-edge background, as the most desirable region in the extended XAFS (EXAFS) data, which is the region above the absorption edge, then normalizing to an edge-jump step for eliminating the difference in the samples, utilizing ATHENA module implemented in the IFEFFIT software packages.<sup>2</sup> Subsequently, for executing the corresponding Fourier transform (FT) function, the EXAFS data of  $\chi(E)$  in the *E*-space would be switched into  $\chi(k)$  in the *k*-space based on  $k=[2m(E-E_0)/\hbar^2]^{1/2}$ . Meanwhile,  $k^3$ -weighted  $\chi(k)$  data were adopted for compensating the weakening of the waves with extended *k*. Finally, the acquired  $k^3$ -weighted EXAFS data of Ti, Co, and Cu *K*-edge would be switched into *R*-space by Fourier transform of  $k^3\chi(k)$  function.

To quantitatively acquire the local structural parameters at Ti, Co, and Cu *K*-edge for the pristine, Co-, and Cu-substituted samples, least-squares fittings for the EXAFS data were performed utilizing the ARTEMIS module of IFEFFIT software packages.<sup>2</sup> The experimental EXAFS data is simulated by following theoretical equation.<sup>1,3</sup>

$$\chi(k) = \sum_j \frac{N_j S_0^2 f_j(k)}{k R_j^2} \exp[-2k^2 \sigma_j^2] \exp\left[\frac{-2R_j}{\lambda_j(k)}\right] \sin[2kR_j + \delta_j(k) + 2\phi_C(k)]$$

Here,  $N_j$  is the number of atoms in the  $j^{\text{th}}$  coordination shell,  $S_0^2$  is the amplitude reduction factor,  $f_j(k)$  is the effective curved-wave backscattering amplitude of the scattering atom,  $R_j$  is the distance between x-ray absorbing central atom and scattering atoms,  $\sigma_j$  is the Debye-Waller parameter (the variation of distances around the average  $R_j$ ),  $\lambda_j(k)$  is the mean free path of excited photoelectron,  $\delta_j(k)$  is the scattering phase shift of scattering atom, and  $\phi_C(k)$  is the phase-shift of absorbing atom, respectively. The functions of  $f_j(k)$ ,  $\lambda_j(k)$  and  $\phi_C(k)$  were calculated with the *ab initio* code FEFF8.2.

It is noted that single-scattering fittings for the EXAFS data at Ti, Cu, and Co *K*-edge for the three samples were carried out in this work. The amplitude reduction factor  $S_0^2$  was treated as fixed value obtained from the foil samples, and the obtained values are 0.54 for Ti *K*-edge, 0.70 for Cu *K*-edge, and 0.95 for Co *K*-edge, respectively. The coordination numbers  $N$  of the first coordination shells, interatomic distances  $R$ , Debye-Waller factor  $\sigma^2$ , and the edge-energy shift  $\Delta E_0$  were guessed as free variable. The fitting EXAFS results were in consistence with lattice parameters determined by powder x-ray diffraction (XRD) and structural Rietveld refinement,<sup>4</sup> demonstrating the sufficiently high precision of local atomic structure based on the EXAFS fitting. According to the above fitting procedure, the repeatable fitting results of EXAFS data are listed in Table S2 in the Supporting Information.

Supplementary Figure S1

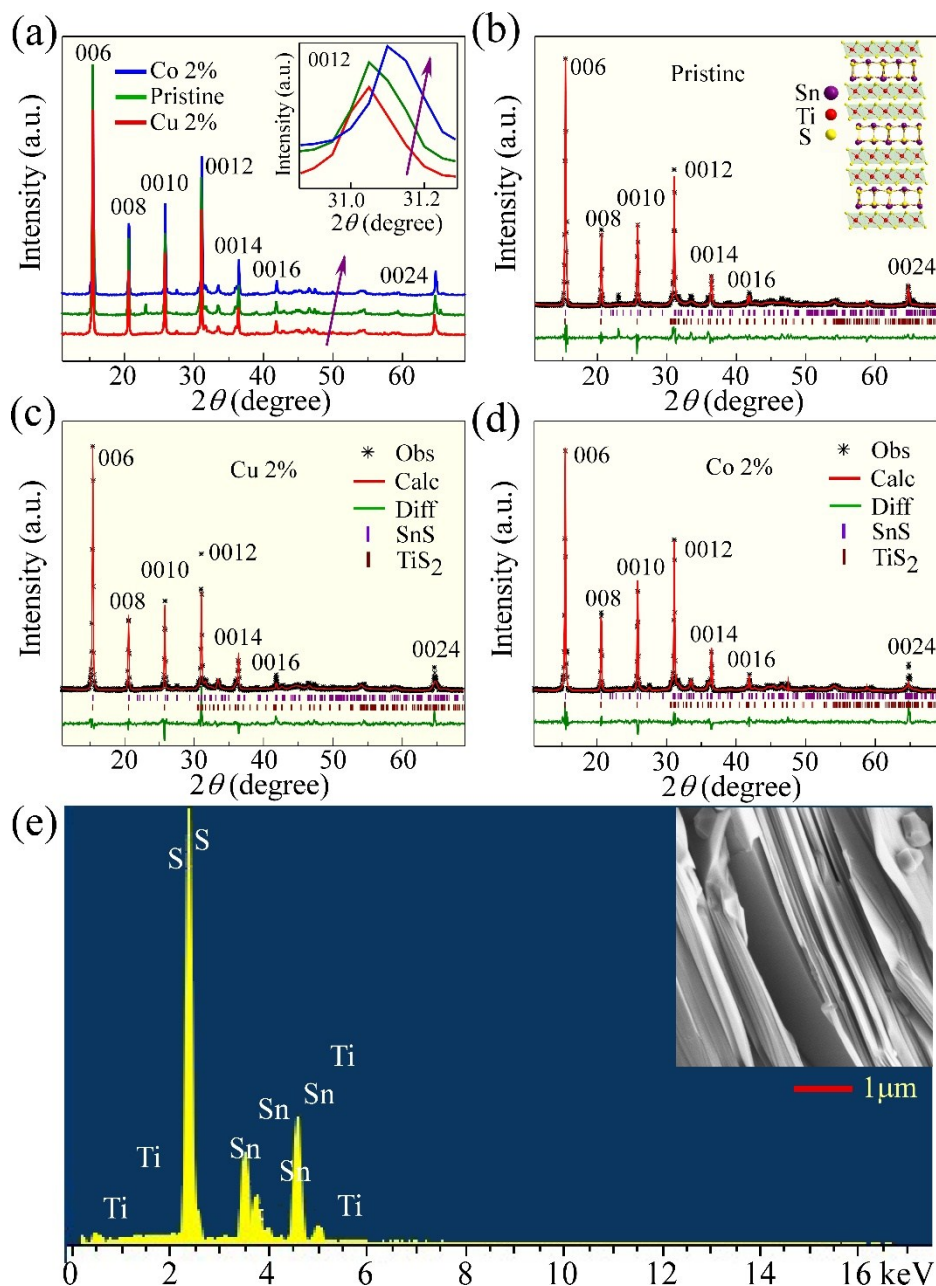

**Figure S1.** (a) Powder XRD patterns for the three samples. (b-d) Powder XRD patterns with the Rietveld refinement for the pristine sample  $(\text{SnS})_{1.2}(\text{TiS}_2)_2$  (b), the Cu-substituted sample  $(\text{SnS})_{1.2}(\text{Cu}_{0.02}\text{Ti}_{0.98}\text{S}_2)_2$  (c) and the Co-substituted sample  $(\text{SnS})_{1.2}(\text{Co}_{0.02}\text{Ti}_{0.98}\text{S}_2)_2$  (d). (e) The EDS patterns for the pristine sample  $(\text{SnS})_{1.2}(\text{TiS}_2)_2$ . The inset of (e) SEM image showing the characteristic layered structure.

## Supplementary Figure S2

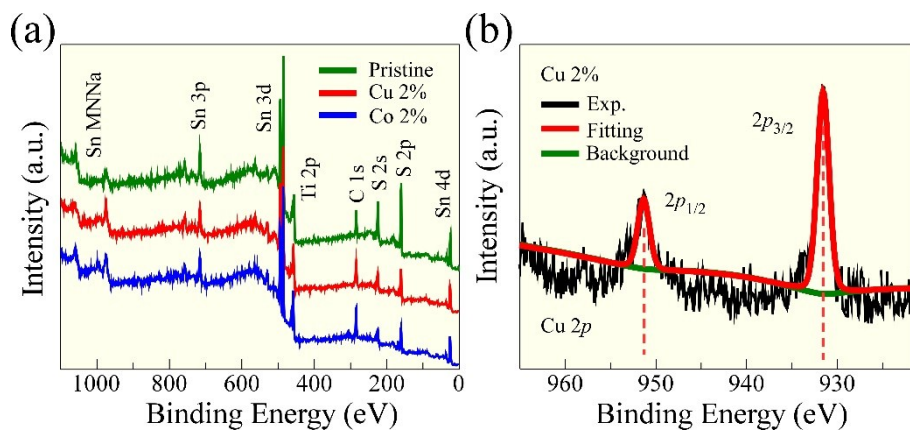

**Figure S2.** (a) XPS spectra for the pristine, Co-, and Cu-substituted samples. (b) XPS spectra of the Cu 2p regions for the Cu-substituted sample. Vertical fitting red lines demonstrate the valence of  $\text{Cu}^{2+}$  ion based on the peak positions of  $2p_{1/2}$  and  $2p_{3/2}$ .

Supplementary Figure S3

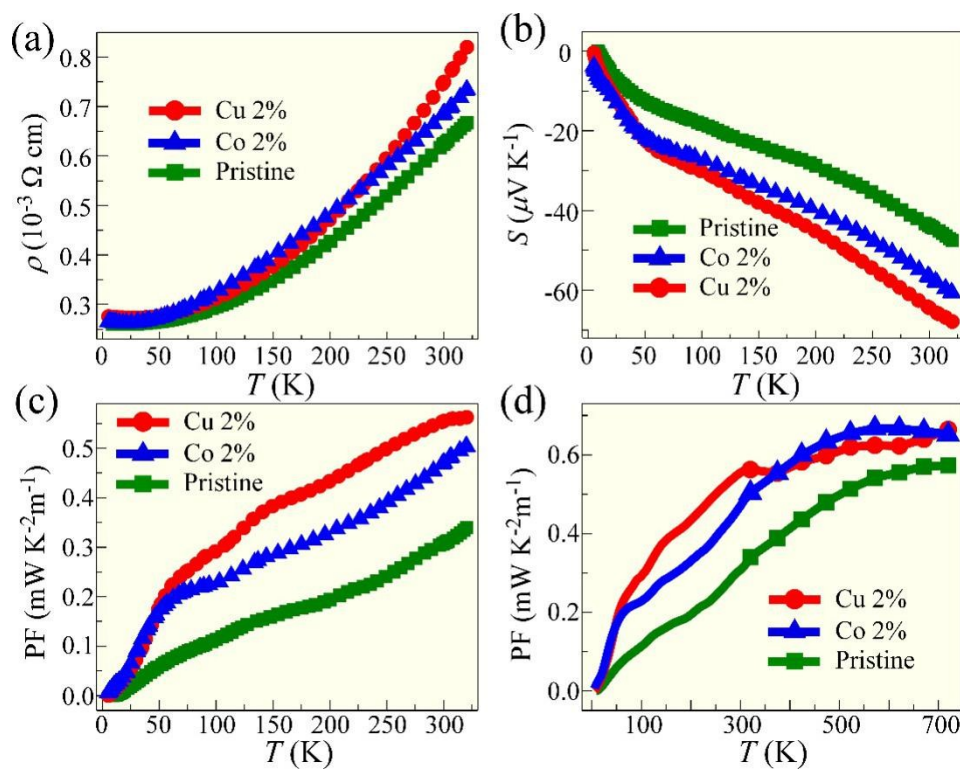

**Figure S3.** (a-c) Temperature dependence of resistivity  $\rho$  (a), Seebeck coefficient (b), and power factor (c) below room temperature for the pristine, Co-, and Cu-substituted samples. (d) Temperature dependence of power factor in the whole temperature range for the three samples.

## Supplementary Figure S4

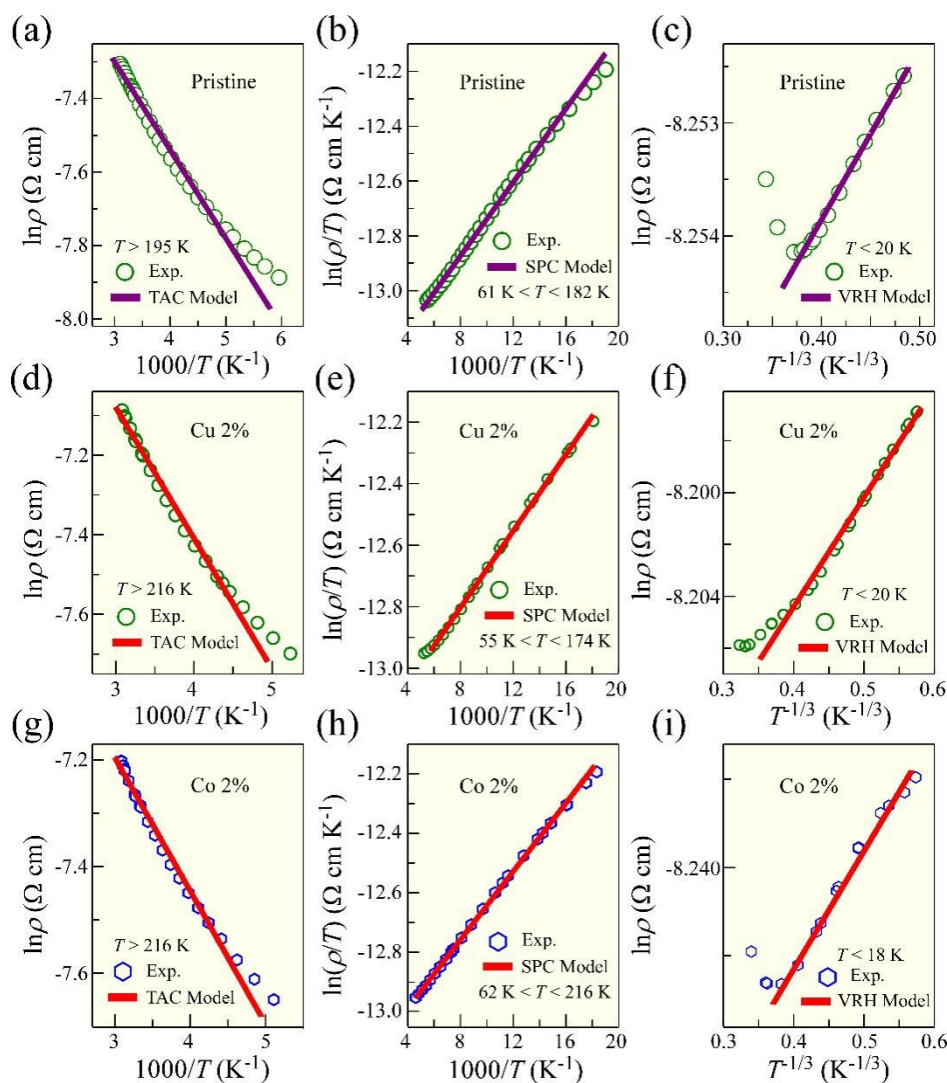

**Figure S4.** (a-i) Plots of  $\ln \rho$  against  $1000/T$ ,  $\ln(\rho/T)$  against  $1000/T$ , and  $\ln \rho$  against  $T^{-1/3}$  for the pristine sample (a-c), the Cu-substituted sample (d-f), and the Co-substituted sample (g-i). The solid lines correspond to the fitting in the different temperature range by thermally activated conduction (TAC) model, small polaron conduction (SPC) model, and variable-range-hopping (VRH) model, respectively.



Supplementary Figure S5

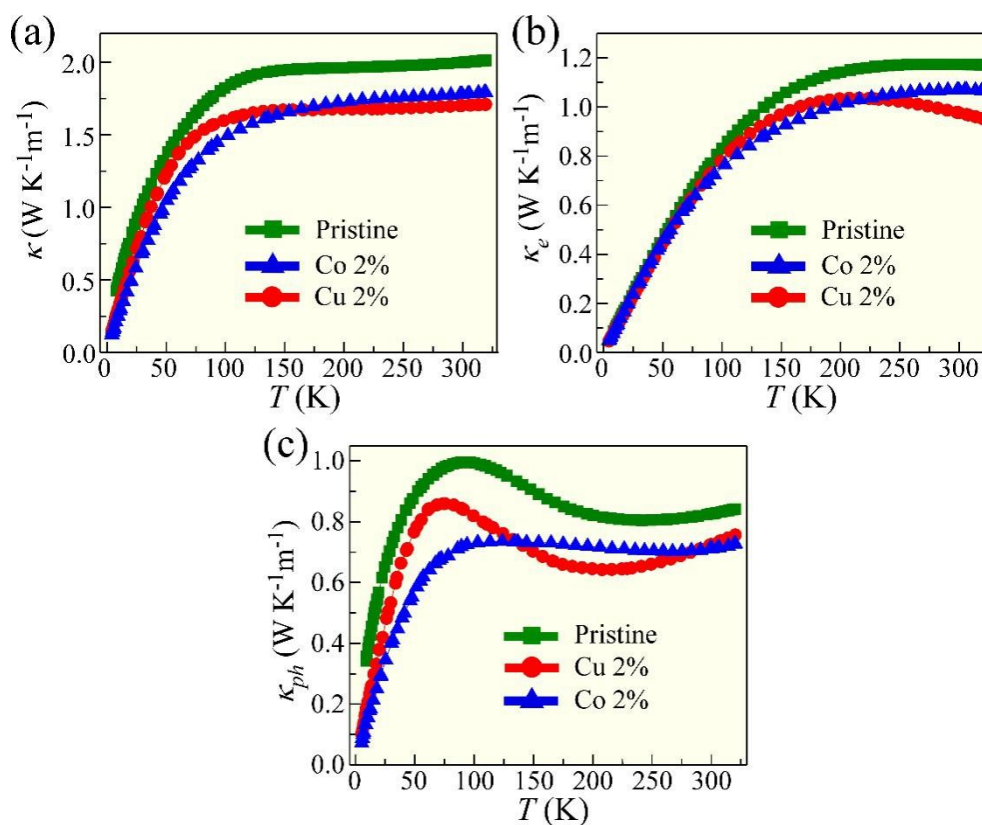

**Figure S5.** (a-c) Temperature dependence of total thermal conductivity  $\kappa$  (a), electrical thermal conductivity  $\kappa_e$  (b), and phononic thermal conductivity  $\kappa_{ph}$  (c) below room temperature for the pristine, Co-, and Cu-substituted samples.



## Supplementary Table S1

**Table S1.** Experimental parameters from Hall measurements at room temperature. The parameters  $R_H$ ,  $n$ ,  $\mu$ , and  $m^*$  represents the Hall coefficient, carrier concentration, carrier mobility, and effective mass, respectively. Evidently, the optimal sample is for the Cu substitution.

| Parameters (320 K)                                                                        | $R_H$ $10^{-9}$ ( $\text{m}^3 \text{C}^{-1}$ ) | $n$ $10^{21}$ ( $\text{cm}^{-3}$ ) | $\mu$ ( $\text{cm}^2 \text{V}^{-1}\text{s}^{-1}$ ) | $m^*$ ( $m_0$ ) |
|-------------------------------------------------------------------------------------------|------------------------------------------------|------------------------------------|----------------------------------------------------|-----------------|
| (SnS) <sub>1.2</sub> (TiS <sub>2</sub> ) <sub>2</sub>                                     | -2.70                                          | 2.31                               | 4.05                                               | 3.9             |
| (SnS) <sub>1.2</sub> (Co <sub>0.02</sub> Ti <sub>0.98</sub> S <sub>2</sub> ) <sub>2</sub> | -3.02                                          | 2.07                               | 4.11                                               | 4.6             |
| (SnS) <sub>1.2</sub> (Cu <sub>0.02</sub> Ti <sub>0.98</sub> S <sub>2</sub> ) <sub>2</sub> | -3.11                                          | 2.01                               | 3.79                                               | 5.0             |

## Supplementary Table S2

**Table S2.** The fitting results of EXAFS data. The parameter  $N$  represents the Ti-S, Co-S and Cu-S coordination, and the parameter  $R$  stands for the corresponding interatomic distance. The parameter  $\sigma^2$  denotes the degree of disorder, and the parameter  $\Delta E_0$  is the edge energy for the pristine, Co-, and Cu-substituted samples.

| Sample                                                                                    | Path | $N$       | $R$ (Å)     | $\sigma^2$ (Å <sup>2</sup> ) | $\Delta E_0$ (eV) | $R$ -factor |
|-------------------------------------------------------------------------------------------|------|-----------|-------------|------------------------------|-------------------|-------------|
| (SnS) <sub>1.2</sub> (TiS <sub>2</sub> ) <sub>2</sub>                                     | Ti-S | 6.43±1.09 | 2.442±0.016 | 0.0051±0.0023                | 3.51±1.61         | 0.0176      |
| (SnS) <sub>1.2</sub> (Co <sub>0.02</sub> Ti <sub>0.98</sub> S <sub>2</sub> ) <sub>2</sub> | Ti-S | 6.44±0.85 | 2.413±0.015 | 0.0070±0.0019                | 3.03±2.58         | 0.0039      |
|                                                                                           | Co-S | 6.18±0.70 | 2.421±0.018 | 0.0084±0.0018                | 3.76±2.13         | 0.0019      |
| (SnS) <sub>1.2</sub> (Cu <sub>0.02</sub> Ti <sub>0.98</sub> S <sub>2</sub> ) <sub>2</sub> | Cu-S | 6.05±0.58 | 2.485±0.016 | 0.0170±0.0020                | 3.70±1.52         | 0.0047      |

Supplementary Table S3

**Table S3.** The values of dimensionless figure of merit  $ZT$  for all of state-of-the-art misfit-layered chalcogenides refs.<sup>[5-11]</sup> Distinctly, the value of  $ZT$  ( $\sim 0.42$ ) at 720 K for the Cu-substituted sample in this work is the highest in all of these compounds.

| Samples                                                              | $T$ (K) | $ZT$ | Reference |
|----------------------------------------------------------------------|---------|------|-----------|
| $(\text{BiS})_{1.2}(\text{TiS}_2)_2$                                 | 700     | 0.28 | [5]       |
| $(\text{SnS})_{1.2}(\text{TiS}_2)_2$                                 | 700     | 0.37 | [5]       |
| $(\text{PbS})_{1.18}(\text{TiS}_2)_2$                                | 700     | 0.30 | [5]       |
| $(\text{Bi}_{0.9}\text{Ca}_{0.1}\text{S})_{1.2}(\text{TiS}_2)_2$     | 750     | 0.24 | [6]       |
| $(\text{BiS})_{1.2}(\text{Mg}_{0.05}\text{Ti}_{0.95}\text{S}_2)_2$   | 750     | 0.17 | [6]       |
| $(\text{Bi}_{0.9}\text{Sr}_{0.1}\text{S})_{1.2}(\text{TiS}_2)_2$     | 750     | 0.16 | [6]       |
| $(\text{BiS})_{1.2}(\text{Ti}_{0.975}\text{Cr}_{0.025}\text{S}_2)_2$ | 750     | 0.29 | [7]       |
| $(\text{BiS})_{1.2}(\text{Ti}_{0.95}\text{Cr}_{0.05}\text{S}_2)_2$   | 750     | 0.25 | [8]       |
| $(\text{LaS})_{1.20}\text{CrS}_2$                                    | 950     | 0.14 | [9]       |
| $(\text{LaS})_{1.14}\text{NbS}_2$                                    | 950     | 0.15 | [9]       |
| $(\text{La}_{1.05}\text{S}_{1.05})_{1.14}\text{NbS}_2$               | 950     | 0.2  | [10]      |
| $\text{Sn}_{1.16}\text{Nb}(\text{Se}_{0.9}\text{S}_{0.1})_{3.16}$    | 760     | 0.03 | [11]      |
| $(\text{SnS})_{1.2}(\text{Cu}_{0.02}\text{Ti}_{0.98}\text{S}_2)_2$   | 720     | 0.42 | This work |
| $(\text{SnS})_{1.2}(\text{Co}_{0.02}\text{Ti}_{0.98}\text{S}_2)_2$   | 720     | 0.35 | This work |

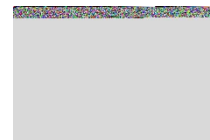

## ARTICLE

### References

- 1 Z. H. Sun, Q. H. Liu, T. Yao, W. S. Yan, S. Q. Wei, *Sci. China Mater.* 2015, **58**, 313-341.
- 2 B. Ravel, M. Newville, *J. Synchrotron Radiat.* 2005, **12**, 537-541.
- 3 Y. J. Chen, S. F. Ji, Y. G. Wang, J. C. Dong, W. X. Chen, Z. Li, R. A. Shen, L. R. Zheng, Z. B. Zhuang, D. S. Wang, Y. D. Li, *Angew. Chem. Int. Ed.* 2017, **56**, 6937-6941.
- 4 C. Yin, Q. Hu, G. Y. Wang, T. Y. Huang, X. Y. Zhou, X. Zhang, Y. W. Dou, B. Kang, J. Tang, N. Liu, R. Ang, *Appl. Phys. Lett.* 2017, **110**, 043507.
- 5 C. L. Wan, Y. F. Wang, N. Wang, K. Koumoto, *Materials* 2010, **3**, 2606-2617.
- 6 Y. E. Putri, C. L. Wan, Y. F. Wang, W. Norimatsu, M. Kusunoki, K. Koumoto, *Scripta Mater.* 2012, **66**, 895-898.
- 7 Y. E. Putri, C. L. Wan, R. Z. Zhang, T. Mori, K. Koumoto, *J. Adv. Ceram.* 2013, **2**, 42-48.
- 8 Y. E. Putri, C. L. Wan, F. Dang, T. Mori, Y. Ozawa, W. Norimatsu, M. Kusunoki, K. Koumoto, *J. Electron. Mater.* 2014, **43**, 1870-1874.
- 9 P. Jood, M. Ohta, H. Nishiate, A. Yamamoto, O. I. Lebedev, D. Berthebaud, K. Suekuni, M. Kunii, *Chem. Mater.* 2014, **26**, 2684-2692.
- 10 P. Jood, M. Ohta, O. I. Lebedev, D. Berthebaud, *Chem. Mater.* 2015, **27**, 7719-7728.
- 11 P. Jood, M. Ohta, *Rsc Adv.* 2016, **6**, 105653-105660.
